# Supplementary material for: Merohedral Mechanism Twining Growth of Natural Cation-Ordered Tetragonal Grossular
Source: MDPI journal article supplement (doi:10.3390/cryst12111638), 2022-11-14
Supplement: s1 [file s1]

# Merohedral mechanism twining growth of natural cation-ordered tetragonal grossular

Taras L. Panikorovskii, Irina O. Galuskina, Vladimir N. Bocharov, Vladimir V. Shilovskikh<sup>‡</sup> and Evgeny V. Galuskin

## 1. X-Ray Supplementary Data for tetragonal grossular

**Table S1.** Atom coordinates, equivalent isotropic displacement parameters and sof's for (H<sub>4</sub>O<sub>4</sub>)<sup>4-</sup> substituted grossular from Wiluy River, Yakutia, Russia.

| <i>Ia<math>\bar{3}</math>d</i> model |         |          |                 |            |            |           |                                          |
|--------------------------------------|---------|----------|-----------------|------------|------------|-----------|------------------------------------------|
| Site                                 | Wyckoff | sof      | <i>apfu</i>     | <i>x</i>   | <i>y</i>   | <i>z</i>  | <i>U</i> <sub>eq</sub> (Å <sup>2</sup> ) |
| X1                                   | 24c     | 1.0      | 3Ca             | ½          | ¾          | 1/8       | 0.0102(3)                                |
| Y1                                   | 16a     | 1.0      | 1.81Al + 0.19Fe | ½          | ½          | 0         | 0.0093(4)                                |
| Z1                                   | 24d     | 0.864(6) | 2.59Si + 0.41□  | ½          | ¾          | 7/8       | 0.0065(4)                                |
| O1                                   | 96h     | 1.0      | 12O             | 0.4538(1)  | 0.6508(1)  | 0.9623(1) | 0.0125(3)                                |
| <i>I4<sub>1</sub>/acd</i> model      |         |          |                 |            |            |           |                                          |
| X1                                   | 16e     | 1.0      | 2Ca             | ½          | ¾          | 5/8       | 0.0108(3)                                |
| X2                                   | 8b      | 1.0      | 1Ca             | ¾          | 0.12520(7) | ½         | 0.0107(2)                                |
| Y1                                   | 16c     | 1.0      | 1.81Al + 0.19Fe | ½          | ½          | ½         | 0.0092(4)                                |
| Z1                                   | 16e     | 0.853(6) | 0.85Si + 0.15□  | ¾          | 0.37506(1) | ½         | 0.0068(4)                                |
| Z2                                   | 8a      | 0.878(7) | 1.76Si + 0.24□  | ½          | ¾          | 3/8       | 0.0069(5)                                |
| O1                                   | 32g     | 1.0      | 1O              | 0.5459(1)  | 0.6509(1)  | 0.4618(1) | 0.0128(4)                                |
| O2                                   | 32g     | 1.0      | 1O              | 0.6506(1)  | 0.4624(2)  | 0.5462(1) | 0.0133(4)                                |
| O3                                   | 32g     | 1.0      | 1O              | 0.7039(2)  | 0.2876(1)  | 0.4008(1) | 0.0131(4)                                |
| <i>I4<sub>1</sub>/a</i> model        |         |          |                 |            |            |           |                                          |
| X1                                   | 8e      | 1.0      | 1Ca             | ½          | ¾          | 0.3759(2) | 0.0116(3)                                |
| X2                                   | 16f     | 1.0      | 2Ca             | 0.37516(6) | 0.5004(1)  | 0.2499(1) | 0.0116(2)                                |
| Y1                                   | 8c      | 1.0      | 0.97Al + 0.03Fe | ½          | ½          | ½         | 0.0074(9)                                |
| Y2                                   | 8d      | 1.0      | 0.87Al + 0.13Fe | ¾          | ¾          | ¼         | 0.0124(9)                                |
| Z1                                   | 4a      | 0.868(4) | 0.43Si + 0.07□  | ½          | ¾          | 5/8       | 0.0081(9)                                |
| Z2                                   | 4b      | 0.862(3) | 0.43Si + 0.07□  | ½          | ¾          | 1/8       | 0.0060(9)                                |
| Z3                                   | 16f     | 0.856(8) | 1.71Si + 0.29□  | 0.62505(9) | 0.4993(2)  | 0.2509(2) | 0.0075(3)                                |
| O1                                   | 16f     | 1.0      | 2O              | 0.4556(4)  | 0.6507(3)  | 0.5381(4) | 0.015(1)                                 |
| O2                                   | 16f     | 1.0      | 2O              | 0.5989(3)  | 0.7974(4)  | 0.2120(3) | 0.014(1)                                 |
| O3                                   | 16f     | 1.0      | 2O              | 0.7140(4)  | 0.6011(4)  | 0.2045(4) | 0.015(1)                                 |
| O4                                   | 16f     | 1.0      | 2O              | 0.7106(4)  | 0.4022(4)  | 0.2972(3) | 0.012(1)                                 |
| O5                                   | 16f     | 1.0      | 2O              | 0.5378(4)  | 0.4537(4)  | 0.1511(4) | 0.013(1)                                 |
| O6                                   | 16f     | 1.0      | 2O              | 0.5375(4)  | 0.5456(4)  | 0.3494(4) | 0.016(1)                                 |
| <i>I<math>\bar{4}</math>2d</i> model |         |          |                 |            |            |           |                                          |
| X1                                   | 8d      | 1.0      | 1Ca             | ¼          | 0.3755(2)  | 3/8       | 0.0106(6)                                |
| X2                                   | 8d      | 1.0      | 1Ca             | ¼          | 0.8748(2)  | 3/8       | 0.0124(7)                                |
| X3                                   | 8c      | 1.0      | 1Ca             | ½          | 0          | 0.5006(3) | 0.0115(3)                                |
| Y1                                   | 16e     | 1.0      | 1.81Al + 0.19Fe | 0.4995(3)  | 0.7502(3)  | 0.3747(3) | 0.0102(4)                                |
| Z1                                   | 4a      | 0.93(2)  | 0.47Si + 0.03□  | ½          | ½          | ½         | 0.009(1)                                 |
| Z2                                   | 8d      | 0.92(1)  | 0.92Si + 0.08□  | ¼          | 0.6244(3)  | 3/8       | 0.009(1)                                 |
| Z3                                   | 4b      | 0.84(2)  | 0.42Si + 0.08□  | ½          | 0          | ¼         | 0.006(1)                                 |
| Z4                                   | 8d      | 0.80(1)  | 0.80Si + 0.20□  | ¾          | 0.8741(3)  | 0.375000  | 0.005(1)                                 |
| O1                                   | 16f     | 1.0      | 2O              | 0.5463(5)  | 0.5980(4)  | 0.4125(5) | 0.010(1)                                 |
| O2                                   | 16f     | 1.0      | 2O              | 0.2968(5)  | 0.5391(5)  | 0.2765(6) | 0.016(1)                                 |
| O3                                   | 16f     | 1.0      | 2O              | 0.3501(5)  | 0.7123(5)  | 0.4203(6) | 0.013(1)                                 |

|    |                 |     |    |           |           |           |          |
|----|-----------------|-----|----|-----------|-----------|-----------|----------|
| O4 | 16 <sup>f</sup> | 1.0 | 2O | 0.4542(5) | 0.8998(5) | 0.3364(6) | 0.018(1) |
| O5 | 16 <sup>f</sup> | 1.0 | 2O | 0.7040(5) | 0.9635(5) | 0.4751(5) | 0.012(1) |
| O6 | 16 <sup>f</sup> | 1.0 | 2O | 0.6511(5) | 0.7878(5) | 0.3285(7) | 0.015(1) |

**Table S2.** Selected interatomic distances (Å) for (H<sub>4</sub>O<sub>4</sub>)<sup>4-</sup> substituted grossular from Wiluy River, Yakutia, Russia.

| <i>Ia</i> $\bar{3}d$ model      |          |    |        |          |    |  |  |
|---------------------------------|----------|----|--------|----------|----|--|--|
| X1–O1                           | 2.494(1) | ×4 | Z1–O1  | 1.671(1) | ×4 |  |  |
| X1–O1                           | 2.341(1) | ×4 |        |          |    |  |  |
| <X1–O>                          | 2.418    |    | Y1–O1  | 1.936(1) | ×4 |  |  |
| <i>I4<sub>1</sub>/acd</i> model |          |    |        |          |    |  |  |
| X1–O1                           | 2.345(2) | ×4 | Y1–O1  | 1.938(2) | ×2 |  |  |
| X1–O3                           | 2.494(2) | ×4 | Y1–O2  | 1.934(2) | ×2 |  |  |
| <X1–O>                          | 2.420    |    | Y1–O3  | 1.938(2) | ×2 |  |  |
|                                 |          |    | <Y1–O> | 1.937    |    |  |  |
| X2–O2                           | 2.343(2) | ×4 |        |          |    |  |  |
| X2–O3                           | 2.497(2) | ×4 | Z1–O2  | 1.674(2) | ×2 |  |  |
| <X2–O>                          | 2.420    |    | Z1–O3  | 1.672(2) | ×2 |  |  |
|                                 |          |    | <Z1–O> | 1.673    |    |  |  |
| Z2–O1                           | 1.666(2) | ×4 |        |          |    |  |  |
| <i>I4<sub>1</sub>/a</i> model   |          |    |        |          |    |  |  |
| X1–O1                           | 2.332(5) | ×2 | Y1–O6  | 1.933(4) | ×2 |  |  |
| X1–O5                           | 2.492(4) | ×2 | <Y1–O> | 1.941    |    |  |  |
| X1–O6                           | 2.501(5) | ×2 |        |          |    |  |  |
| X1–O2                           | 2.356(5) | ×2 | Y2–O3  | 1.908(5) | ×2 |  |  |
| <X1–O>                          | 2.420    |    | Y2–O5  | 1.941(4) | ×2 |  |  |
|                                 |          |    | Y2–O2  | 1.944(4) | ×2 |  |  |
| X2–O1                           | 2.520(4) |    | <Y2–O> | 1.931    |    |  |  |
| X2–O3                           | 2.496(5) |    |        |          |    |  |  |
| X2–O3                           | 2.333(5) |    | Z1–O1  | 1.662(4) | ×4 |  |  |
| X2–O5                           | 2.340(5) |    |        |          |    |  |  |
| X2–O4                           | 2.356(5) |    | Z2–O2  | 1.672(4) | ×4 |  |  |
| X2–O4                           | 2.491(5) |    |        |          |    |  |  |
| X2–O6                           | 2.337(5) |    | Z3–O3  | 1.707(5) |    |  |  |
| X2–O2                           | 2.475(5) |    | Z3–O5  | 1.674(4) |    |  |  |
| <X2–O>                          | 2.419    |    | Z3–O4  | 1.641(5) |    |  |  |
|                                 |          |    | Z3–O6  | 1.668(5) |    |  |  |
| Y1–O1                           | 1.931(4) | ×2 | <Z3–O> | 1.673    |    |  |  |
| Y1–O4                           | 1.960(5) | ×2 |        |          |    |  |  |
| <i>I</i> $\bar{4}2d$ model      |          |    |        |          |    |  |  |
| X1–O1                           | 2.495(6) | ×2 | Y1–O1  | 1.972(7) |    |  |  |
| X1–O2                           | 2.330(7) | ×2 | Y1–O2  | 1.935(7) |    |  |  |
| X1–O6                           | 2.342(6) | ×2 | Y1–O6  | 1.951(6) |    |  |  |
| X1–O3                           | 2.484(7) | ×2 | Y1–O3  | 1.914(7) |    |  |  |
| <X1–O>                          | 2.413    |    | Y1–O5  | 1.939(7) |    |  |  |
|                                 |          |    | Y1–O4  | 1.902(6) |    |  |  |
| X2–O6                           | 2.501(6) | ×2 | <Y1–O> | 1.936    |    |  |  |
| X2–O3                           | 2.341(6) | ×2 |        |          |    |  |  |
| X2–O5                           | 2.345(6) | ×2 | Z1–O1  | 1.648(6) | ×4 |  |  |
| X2–O4                           | 2.500(6) | ×2 |        |          |    |  |  |
| <X2–O>                          | 2.421    |    | Z2–O3  | 1.697(7) | ×2 |  |  |
|                                 |          |    | Z2–O2  | 1.675(7) | ×2 |  |  |
| X3–O1                           | 2.347(7) | ×2 | <Z2–O> | 1.686    |    |  |  |

|        |          |    |        |          |    |
|--------|----------|----|--------|----------|----|
| X3–O2  | 2.495(6) | ×2 |        |          |    |
| X3–O5  | 2.500(6) | ×2 | Z3–O4  | 1.684(5) | ×4 |
| X3–O4  | 2.351(6) | ×2 |        |          |    |
| <X3–O> | 2.423    |    | Z4–O6  | 1.657(6) | ×2 |
|        |          |    | Z4–O5  | 1.667(6) | ×2 |
|        |          |    | <Z4–O> | 1.662    |    |

**Table S3.** Anisotropic displacement parameters ( $\text{\AA}^2 \times 10^3$ ) for  $(\text{H}_4\text{O}_4)^{4-}$  substituted grossular from Wiluy River, Yakutia, Russia. The Anisotropic displacement factor exponent takes the form:  $-2\pi^2[\text{h}^2\text{a}^*2\text{U}_{11}+2\text{hka}^*\text{b}^*\text{U}_{12}+\dots]$ .

| <i>Ia<math>\bar{3}</math>d</i> model |          |          |          |          |          |          |
|--------------------------------------|----------|----------|----------|----------|----------|----------|
| Site                                 | $U_{11}$ | $U_{22}$ | $U_{33}$ | $U_{23}$ | $U_{13}$ | $U_{12}$ |
| X1                                   | 11.1(3)  | 11.1(3)  | 8.5(4)   | 0        | 0        | -2.8(2)  |
| Y1                                   | 9.3(4)   | 9.3(4)   | 9.3(4)   | -1.0(2)  | 1.0(2)   | 1.0(2)   |
| Z1                                   | 6.7(5)   | 6.7(5)   | 6.1(6)   | 0        | 0        | 0        |
| O1                                   | 12.0(6)  | 10.8(6)  | 14.6(6)  | -2.3(5)  | -1.4(4)  | 0.6(5)   |
| <i>I4<math>_1</math>/acd</i> model   |          |          |          |          |          |          |
| X1                                   | 10.1(3)  | 10.1(3)  | 12.0(5)  | 0        | 0        | 2.7(4)   |
| X2                                   | 10.1(4)  | 7.7(4)   | 14.4(4)  | 0        | -2.7(2)  | 0        |
| Y1                                   | 6.9(6)   | 8.5(7)   | 12.3(6)  | -1.0(3)  | -1.3(3)  | -0.8(4)  |
| Z1                                   | 5.6(6)   | 5.0(6)   | 9.7(6)   | 0        | -0.4(4)  | 0        |
| Z2                                   | 5.9(6)   | 5.9(6)   | 9.0(8)   | 0        | 0        | 0        |
| O1                                   | 11.1(9)  | 9.5(9)   | 17.8(9)  | -2.5(7)  | 0.5(7)   | -0.3(8)  |
| O2                                   | 9.5(9)   | 14.6(9)  | 15.8(9)  | 1.3(7)   | -1.1(7)  | -2.4(8)  |
| O3                                   | 10.2(9)  | 13.0(9)  | 16.1(9)  | 2.6(7)   | 0.3(7)   | 2.2(7)   |
| <i>I4<math>_1</math>/a</i> model     |          |          |          |          |          |          |
| X1                                   | 9.5(11)  | 11.3(11) | 14.1(5)  | 0        | 0        | -2.7(3)  |
| X2                                   | 8.5(4)   | 10.5(4)  | 15.7(4)  | -2.5(2)  | 0.0(8)   | 2.3(8)   |
| Y1                                   | 4.3(15)  | 10.2(16) | 7.8(13)  | 3.9(11)  | -3.1(11) | 1.1(9)   |
| Y2                                   | 6.3(15)  | 12.0(16) | 19.0(14) | 0.0(12)  | -1.3(11) | 0.4(9)   |
| Z1                                   | 6.1(14)  | 6.1(14)  | 12.2(18) | 0        | 0        | 0        |
| Z2                                   | 4.9(13)  | 4.9(13)  | 8.4(17)  | 0        | 0        | 0        |
| Z3                                   | 5.9(5)   | 6.1(5)   | 10.6(6)  | -0.5(3)  | -0.6(13) | -2.5(12) |
| O1                                   | 11(3)    | 6(3)     | 29(2)    | 1(2)     | -8(2)    | 4(2)     |
| O2                                   | 16(3)    | 14(2)    | 12.5(19) | 8(2)     | 4(2)     | -2(2)    |
| O3                                   | 15(3)    | 15(3)    | 17(2)    | -5(2)    | -4(2)    | -2(2)    |
| O4                                   | 16(3)    | 5(2)     | 18(2)    | 1(2)     | 0(2)     | -7(2)    |
| O5                                   | 9(3)     | 9(3)     | 22(2)    | -5(2)    | -2(2)    | 0(2)     |
| O6                                   | 19(3)    | 14(3)    | 15(2)    | 6(2)     | -7(2)    | -3(3)    |
| <i>I<math>\bar{4}</math>2d</i> model |          |          |          |          |          |          |
| X1                                   | 8.8(13)  | 9.3(12)  | 18.0(13) | 0        | 4.8(10)  | 0        |
| X2                                   | 12.4(14) | 8.0(12)  | 13.6(11) | 0        | -0.6(10) | 0        |
| X3                                   | 15.9(14) | 5.8(13)  | 14.6(7)  | 0        | 0        | -2.7(5)  |
| Y1                                   | 7.8(9)   | 8.5(9)   | 13.4(8)  | -1.2(4)  | 1.6(4)   | 0.8(4)   |
| Z1                                   | 7.4(17)  | 7.4(17)  | 12(2)    | 0        | 0        | 0        |
| Z2                                   | 7.5(19)  | 7.7(18)  | 16.7(18) | 0        | 0.4(12)  | 0        |
| Z3                                   | 4.2(19)  | 4.2(19)  | 10(3)    | 0        | 0        | 0        |
| Z4                                   | 4.7(16)  | 4.2(16)  | 5.1(15)  | 0        | 0.5(10)  | 0        |
| O1                                   | 10(3)    | 6(3)     | 39(4)    | -11(3)   | 3(4)     | 1(3)     |

| $Ia\bar{3}d$ model |          |          |          |          |          |          |
|--------------------|----------|----------|----------|----------|----------|----------|
| Site               | $U_{11}$ | $U_{22}$ | $U_{33}$ | $U_{23}$ | $U_{13}$ | $U_{12}$ |
| O2                 | 12(3)    | 21(3)    | 18(3)    | 7(3)     | -3(3)    | -1(3)    |
| O3                 | 14(3)    | 22(3)    | 16(3)    | 6(3)     | -3(3)    | 8(3)     |
| O4                 | 14(3)    | 15(3)    | 6(2)     | 6(2)     | -3(3)    | 0(3)     |
| O5                 | 11(3)    | 7(3)     | 20(3)    | -2(3)    | 2(3)     | -4(3)    |
| O6                 | 7(3)     | 11(3)    | 18(3)    | -3(3)    | 6(3)     | -3(3)    |
